# Supplementary material for: Alterations of blood coagulation in controlled human malaria infection
Source: Springer Nature journal article supplement (doi:10.1186/s12936-015-1079-3), 2016-01-07
Supplement: MOESM1 [file 9762024]

**Additional Table 1.** Peak thrombin generation at 3 different time points for all 22 individual study subjects who developed parasitemia, including information about PfSZ Challenge (route of administration, parasite dose), development of symptoms during infection and parasitemia.

| Subject | Route | Dose | Symptoms    | Parasites/ $\mu$ l | Peak thrombin, nM |                             |                |
|---------|-------|------|-------------|--------------------|-------------------|-----------------------------|----------------|
|         |       |      |             |                    | At baseline       | 1-3 days before parasitemia | At parasitemia |
| 1       | ID    | 2500 | None        | 7.5                | 201.5             | 237.0                       | 168.1          |
| 2       | IV    | 800  | None        | 2.5                | 255               | 161.0                       | 295.6          |
| 3       | IV    | 200  | None        | 54.0               | 191.7             | 152.8                       | 159.3          |
| 4       | IV    | 3200 | Symptomatic | 6.5                | 241.8             | 249.9                       | 165.4          |
| 5       | ID    | 2500 | None        | 11.0               | 40.0              | 84.6                        | 66.2           |
| 6       | ID    | 2500 | None        | 8.0                | 172.9             | 108.5                       | 119.4          |
| 7       | IV    | 800  | None        | 2.5                | 125.9             | 111.6                       | 149.7          |
| 8       | IV    | 3200 | Symptomatic | 7.5                | 325.9             | 178.7                       | 211.4          |
| 9       | IV    | 50   | Symptomatic | 2.0                | 92.8              | 280.9                       | 248.6          |
| 10      | ID    | 2500 | None        | 3.5                | 164.4             | 328.3                       | 276.9          |
| 11      | IV    | 800  | None        | 6.0                | 231.9             | 200.2                       | 366.5          |
| 12      | IV    | 800  | None        | 6.0                | 116.3             | 132.4                       | 229.1          |
| 13      | IV    | 800  | Symptomatic | 9.5                | 189.3             | 241.1                       | 233.9          |
| 14      | IV    | 800  | None        | 8.5                | 236.3             | 236.6                       | 352.9          |
| 15      | IV    | 800  | None        | 9.0                | 199.5             | 182.1                       | 221.6          |
| 16      | IV    | 3200 | Symptomatic | 5.5                | 218.9             | 89.4                        | 460.2          |
| 17      | IV    | 3200 | Symptomatic | 6.5                | 136.8             | 134.1                       | 173.3          |
| 18      | IV    | 3200 | Symptomatic | 7.5                | 138.2             | 98.6                        | 169.5          |
| 19      | IV    | 3200 | Symptomatic | 10.0               | 224.7             | 187.6                       | 207.3          |
| 20      | IV    | 3200 | Symptomatic | 7.0                | 191.3             | 236.0                       | 340.6          |
| 21      | IV    | 3200 | None        | 9.5                | 190.6             | 26.0                        | 241.1          |
| 22      | IV    | 3200 | None        | 9                  | 381.8             | 330.7                       | 431.2          |
